# Supplementary material for: Off-resonance correction for pseudo-continuous arterial spin labeling using the optimized encoding scheme
Source: PubMed Central journal article supplement (PMC6892252; doi:10.1016/j.neuroimage.2019.05.083), 2019-10-01
Supplement: mmc1.pdf [file mmc1.pdf]

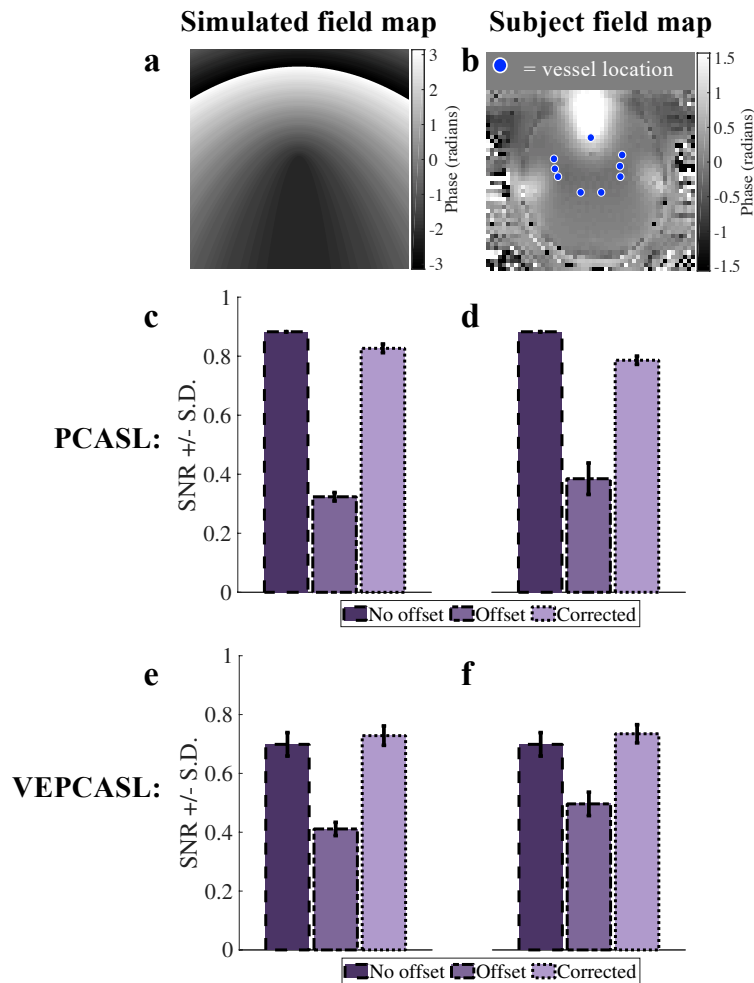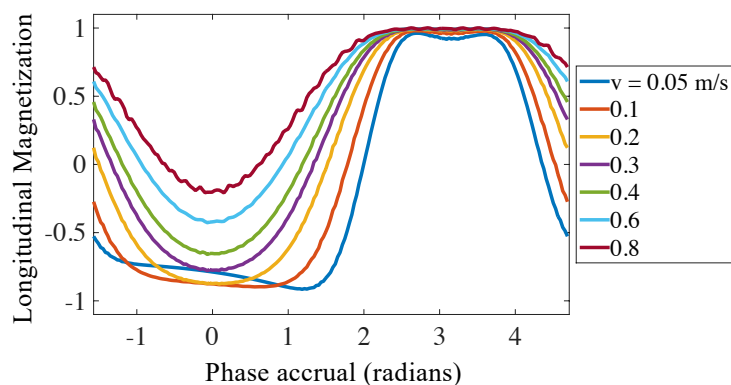

**Supplementary Figure 2:** Unipolar VEPCASL encoding functions derived from Bloch simulations (as described in (Berry et al., 2015a)) for a range of average flow velocities,  $v$ , assuming a laminar flow profile.
